# Supplementary material for: Association of n-6 PUFAs with the risk of diabetic retinopathy in diabetic patients
Source: PubMed Central journal article supplement — Endocr Connect. 2020 Oct 8;9(12):1191–201. doi: 10.1530/EC-20-0370 (PMC7774753; doi:10.1530/ec-20-0370), 2020-10-08
Supplement: supplementary_table_1.pdf [file supplementary_table_1.pdf]

Supplemental table 1. Analytical information of PUFAs markers

| Markers          | Retention Time, min | Exact Mass, Da | CV in QC samples, % |
|------------------|---------------------|----------------|---------------------|
| <b>n-6 PUFAs</b> |                     |                |                     |
| 18:2n-6 (LA)     | 11.1                | 280            | 17.8                |
| 18:3n-6 (GLA)    | 10.5                | 278            | 13.3                |
| 20:2n-6 (EDA)    | 12.0                | 308            | 18.4                |
| 20:3n-6 (DGLA)   | 11.3                | 306            | 15.7                |
| 20:4n-6 (AA)     | 11.0                | 304            | 17.3                |
| <b>n-3 PUFAs</b> |                     |                |                     |
| 18:3n-3 (ALA)    | 10.5                | 278            | 11.0                |
| 18:4n-3 (SA)     | 7.7                 | 276            | 24.7                |
| 20:3n-3 (ETA)    | 12.2                | 306            | 20.3                |
| 20:5n-3 (EPA)    | 10.5                | 302            | 15.6                |
| 22:6n-3 (DHA)    | 10.8                | 328            | 16.3                |

Abbreviations: PUFA, polyunsaturated fatty acid; CV, coefficient of variation; QC, quality control; LA, linoleic acid;

GLA, gamma-linolenic acid; EDA, eicosadienoic acid; DGLA, dihomo-gamma-linolenic acid; AA, arachidonic acid;

ALA, alpha-linolenic acid; SA, Stearidonic Acid; ETA, Eicosatrienoic Acid; EPA, Eicosapentaenoic acid; DHA,

Docosahexaenoic acid.
