# Supplementary material for: Association of n-6 PUFAs with the risk of diabetic retinopathy in diabetic patients
Source: PubMed Central journal article supplement — Endocr Connect. 2020 Oct 8;9(12):1191–201. doi: 10.1530/EC-20-0370 (PMC7774753; doi:10.1530/ec-20-0370), 2020-10-08
Supplement: supplementary_table_2.pdf [file supplementary_table_2.pdf]

Supplemental table 2. Participants received diabetes medications in the training set and testing set

| Variables         | Training set |       | Testing set |       |
|-------------------|--------------|-------|-------------|-------|
|                   | DM           | DR    | DM          | DR    |
| Insulin, n/N      | 38/49        | 34/49 | 13/20       | 13/20 |
| Metformin, n/N    | 16/49        | 22/49 | 8/20        | 7/20  |
| Gliclazide, n/N   | 7/49         | 10/49 | 5/20        | 6/20  |
| Acarbose, n/N     | 6/49         | 3/49  | 3/20        | 2/20  |
| Pioglitazone, n/N | 0/49         | 1/49  | 2/20        | 0/20  |
| Other, n/N        | 1/49         | 1/49  | 0/20        | 1/20  |

*Abbreviations: DM, type 2 diabetes (T2D) without diabetic retinopathy; DR, T2D with diabetic retinopathy.*

*n, the number of exposed persons in each group; N, group size.*
