# Supplementary material for: Association of n-6 PUFAs with the risk of diabetic retinopathy in diabetic patients
Source: PubMed Central journal article supplement — Endocr Connect. 2020 Oct 8;9(12):1191–201. doi: 10.1530/EC-20-0370 (PMC7774753; doi:10.1530/ec-20-0370), 2020-10-08
Supplement: supplementary_table_3.pdf [file supplementary_table_3.pdf]

Supplemental table 3. Association between the 1<sup>st</sup> principal component and the likelihood of DR with adjusting for diabetes medications

| The 1 <sup>st</sup> principal component | OR (95% CI) in the basic model | OR (95% CI) in the adjusted models |                  |                 |                 |                 |                 |
|-----------------------------------------|--------------------------------|------------------------------------|------------------|-----------------|-----------------|-----------------|-----------------|
|                                         |                                | Insulin                            | Metformin        | Gliclazide      | Acarbose        | Pioglitazone    | Others          |
| Training set                            | 0.62 (0.43,0.87)               | 0.62 (0.44,0.89)                   | 0.64 (0.44,0.93) | 0.61(0.42,0.87) | 0.62(0.43,0.88) | 0.62(0.44,0.89) | 0.62(0.43,0.87) |
| Testing set                             | 0.23 (0.04,1.31)               | 0.23 (0.04,1.31)                   | 0.07(0.00,2.69)  | 0.18(0.02,1.88) | 0.19(0.03,1.38) | 0.24(0.04,1.34) | 0.23(0.04,1.31) |

*OR: odds ratio, CI: confidence interval, DR: diabetic retinopathy.*

*Basic model: the 1<sup>st</sup> and 2<sup>nd</sup> principal components + systolic blood pressure + diabetes duration.*

*Adjusted model: basic model + an individual medication per time.*
