# Supplementary figures and images for: Association of n-6 PUFAs with the risk of diabetic retinopathy in diabetic patients
Source: PubMed Central journal article supplement — Endocr Connect. 2020 Oct 8;9(12):1191–201. doi: 10.1530/EC-20-0370 (PMC7774753; doi:10.1530/ec-20-0370), 2020-10-08

### $\Delta 6$ -desaturase activity

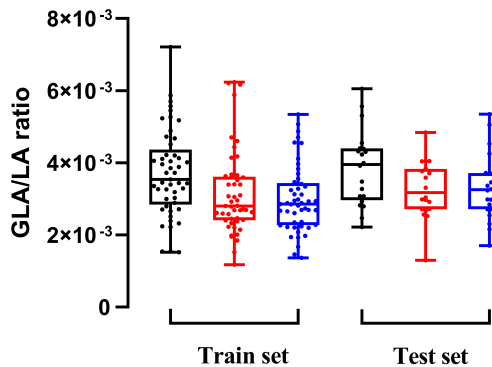

### Elongase activity

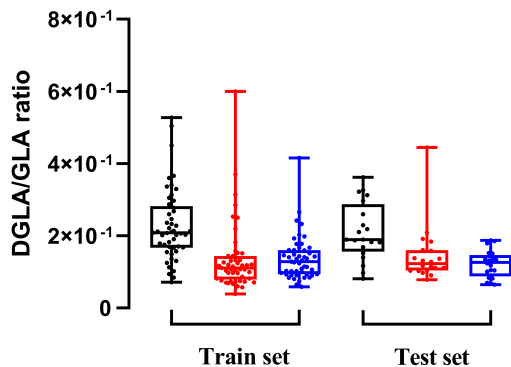

### $\Delta 5$ -desaturase activity

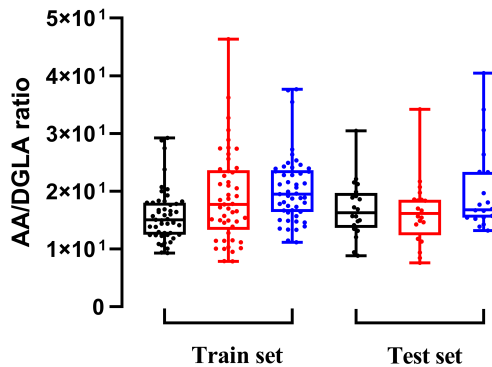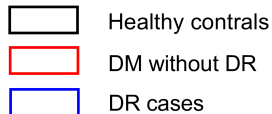

Supplement: supplementary_figure_2.pdf [file supplementary_figure_2.pdf]
